# Supplementary material for: Regulation of Cellular Senescence Is Independent from Profibrotic Fibroblast-Deposited ECM
Source: MDPI journal article supplement (doi:10.3390/cells10071628), 2021-06-29
Supplement: s1 [file s1]

## Supplementary Data

# Regulation of Cellular Senescence Is Independent from Profibrotic Fibroblast-Deposited ECM

Kaj E.C. Blokland <sup>1,2,3,4</sup>, Habibie Habibie <sup>2,5,6</sup>, Theo Borghuis <sup>1,2</sup>, Greta J. Teitsma <sup>1,2</sup>, Michael Schuliga <sup>3</sup>, Barbro N. Melgert <sup>1,2,5</sup>, Darryl A. Knight <sup>3,4,7</sup>, Corry-Anke Brandsma <sup>1,2</sup>, Simon D. Pouwels <sup>1,2,8</sup> and Janette K. Burgess <sup>1,2,\*</sup>

### Senescence-associated $\beta$ -galactosidase protocol

Cellular senescence was assessed using a previously described protocol for senescence-associated  $\beta$ -galactosidase (SA- $\beta$ -Gal) staining [43]. Fixed fibroblasts were washed with PBS and SA- $\beta$ -Gal staining solution was added. Plates were incubated in a dry incubator at 37 °C for 16 h. Staining solution was aspirated before washed with PBS. PBS containing 1  $\mu$ g/mL 4',6-diamidino-2-phenylindole (DAPI; Sigma-Aldrich) was added and plates were incubated in the dark for 10 min, washed and stored in 70% glycerol in PBS at 4 °C. Plates were imaged using a TissueFAXS automated analysis system (TissueGnostics, Vienna, Austria). Brightfield (SA- $\beta$ -Gal) and DAPI images were exported using TissueFAXS Viewer 7.0 (TissueGnostics) and analysed in FIJI [44,45]. To count the number of nuclei the DAPI images were opened in FIJI. First a background subtraction was performed with a rolling ball radius of 50.0 pixels followed by a threshold setting from 35 to 255. After the image was converted to a mask a “watershed segmentation” was run. Finally, “Analyse particles” was run with size setting of “8-infinity”. To count the number of SA- $\beta$ -Gal positive cells the brightfield images were opened in FIJI. First the images were colour deconvoluted with vector settings “0.960,0.230,0.150,0.150,0.850,0.500,0.000,0.000,0.000” to extract the SA- $\beta$ -Gal positive staining. Analyse Particles was then run on the image with the SA- $\beta$ -Gal staining with size settings: “125 to infinity” and a circularity of “0.20 - 1.00”. Total cell numbers and SA- $\beta$ -Gal positive cells were used to calculate the percentage of SA- $\beta$ -Gal positive cells. To improve the quality of the images, all SA- $\beta$ -Gal images in S1 and S7 have undergone the following modifications. First, we performed a white balance correction using the ImageJ macro “White balance correction 1.0” ([http://pmascalchi.github.io/ImageJ\\_Auto-white-balance-correction/](http://pmascalchi.github.io/ImageJ_Auto-white-balance-correction/)), then we enhanced the brightness (-20%), contrast (+20%) and sharpness (+50%) using the build-in function of Microsoft PowerPoint.

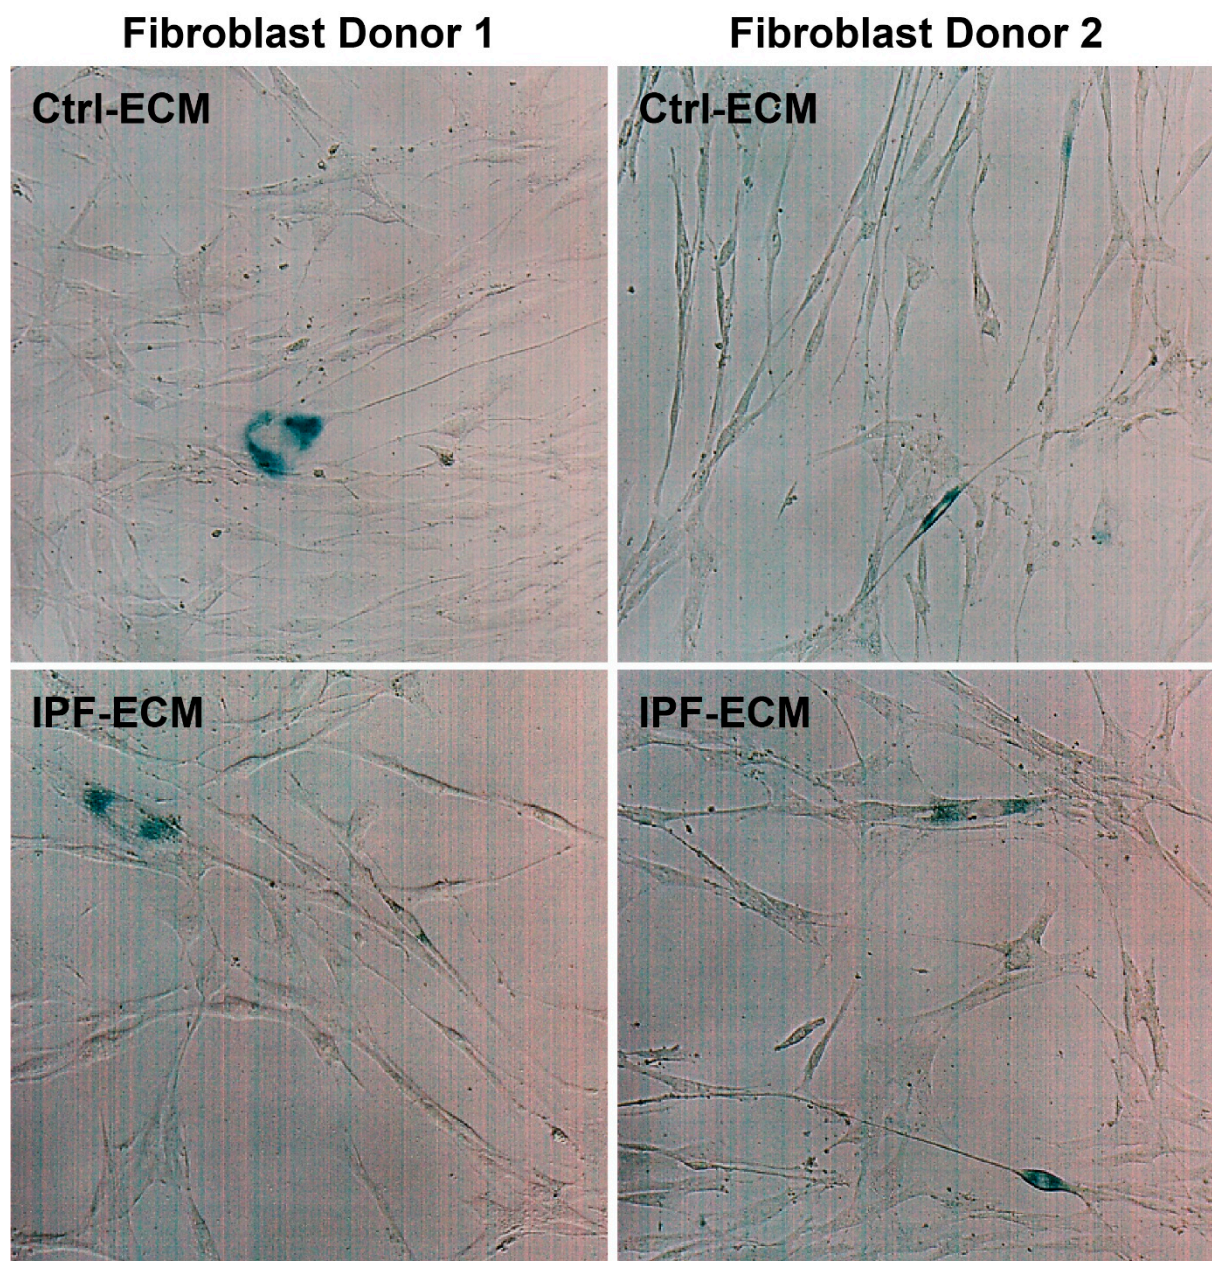

**Figure S1.** SA-β-Gal positive cells cultured on Ctrl- and IPF derived ECM. Ctrl-LFs were cultured for up to three days on Ctrl or IPF derived ECM and SA-β-Gal positive (blue) cells were visualised using a TissueFAXS and counted using ImageJ. Illustrated photographs are representative images of in total 6 unique donors.

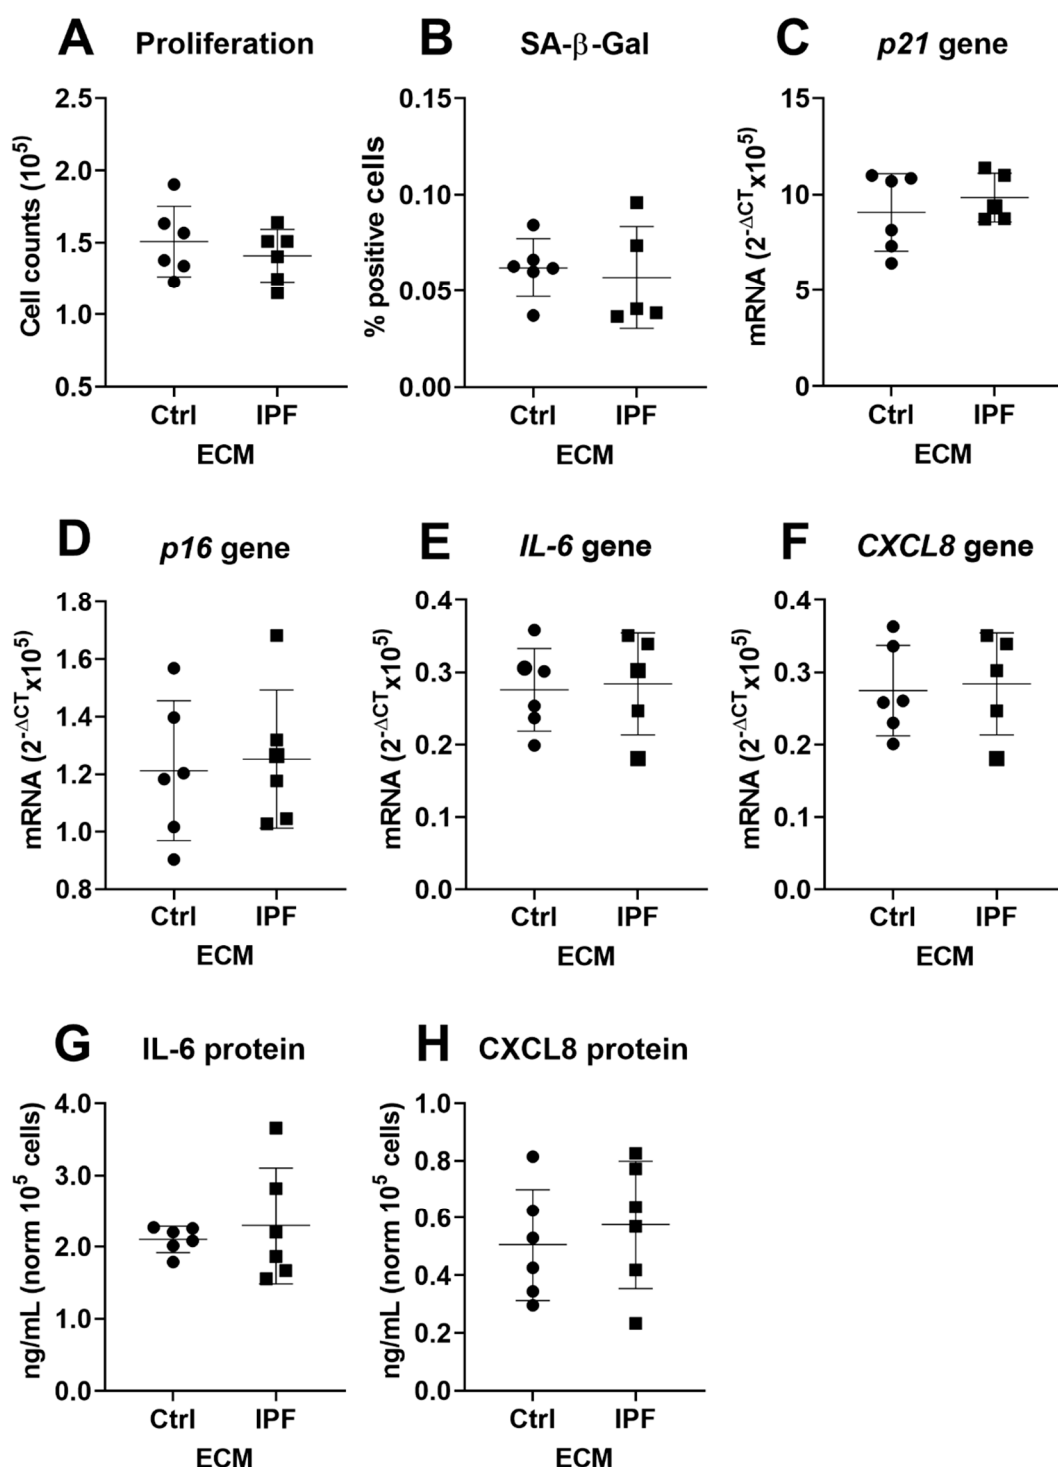

**Figure S2.** Markers of senescence in Ctrl-LF cultured on Ctrl- or IPF-derived ECM. Ctrl-LFs were cultured for up to three days on Ctrl or IPF derived ECM and proliferation was assessed by cell enumeration (A), and SA- $\beta$ -Gal positive cells were counted (B). Panel (C) and (D) demonstrate cell-cycle inhibitors *p21*<sup>Waf1/Cip1</sup> and *p16*<sup>Ink4a</sup> after three days of culture. Panel (E–H) gene expression and protein secretion of known SASP factors IL-6 and CXCL8. Gene expression data were normalised against 18S and were expressed as  $2^{-\Delta\Delta CT} \times 10^5$  ( $n = 5–6$ ). Levels of cytokine production in supernatant were normalised to total cell number expressed as ng/mL per  $10^5$  cells ( $n = 5–6$ ). Wilcoxon matched-pairs signed rank test was used to measure difference between Ctrl and IPF and was considered significant at  $p < 0.05$ .

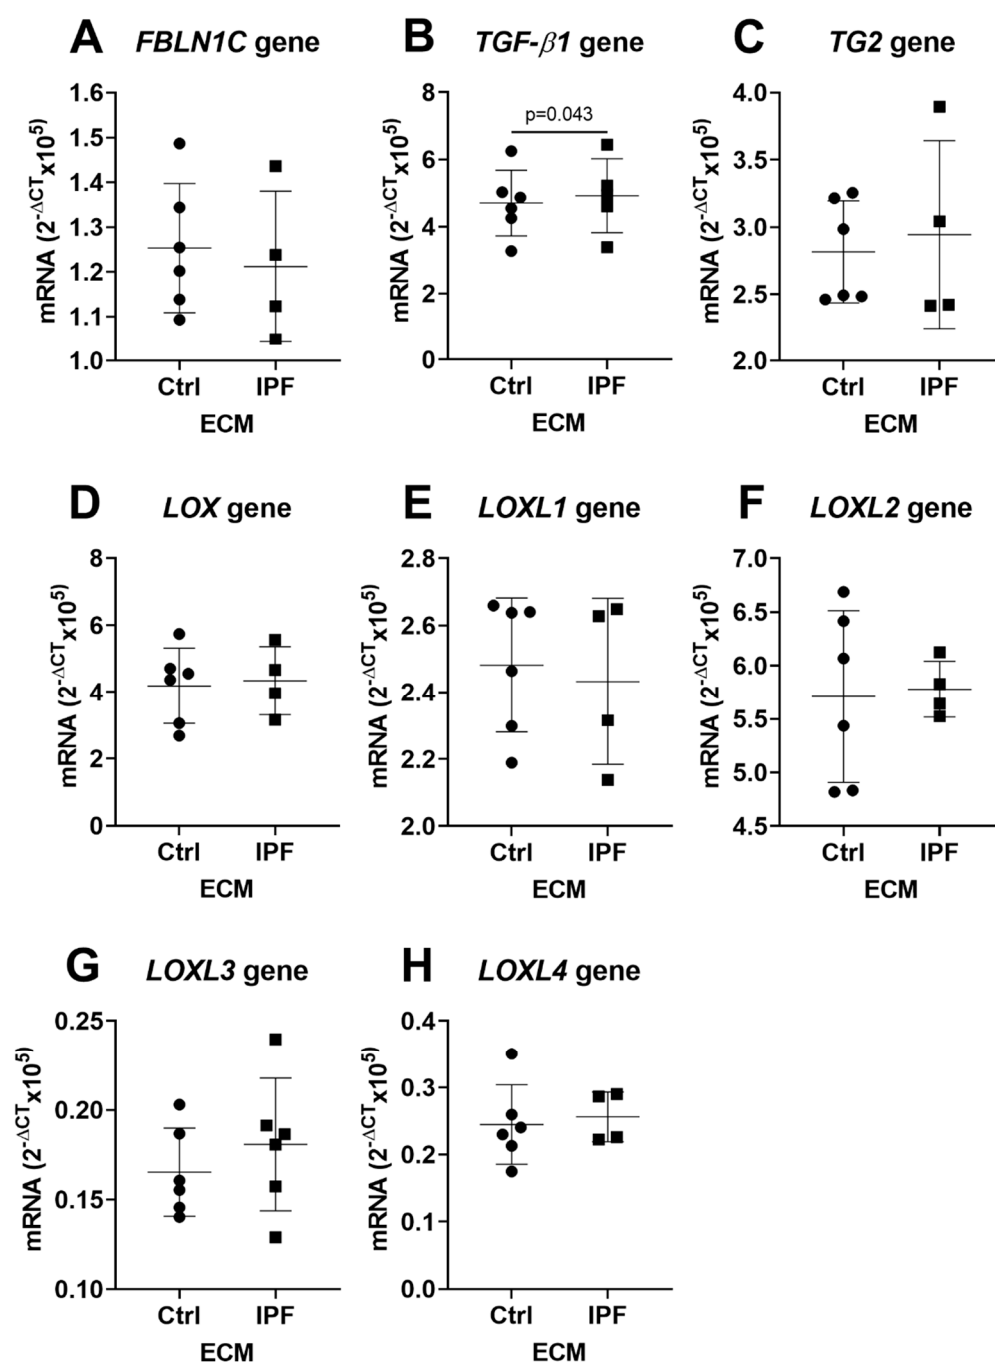

**Figure S3.** Fibrosis-associated and crosslink gene expression. Ctrl-LFs were cultured for up to three days on Ctrl or IPF derived ECM before expression levels of Fbln1c, TGF-β1, TG2, LOX and LOXL1–4 were assessed (**A–H**). Gene expression data were normalised against 18S and were expressed as  $2^{-\Delta CT} \times 10^5$  ( $n = 5–6$ ). Wilcoxon matched-pairs signed rank

test was used to measure difference between Ctrl and IPF and was considered significant at  $p < 0.05$ .

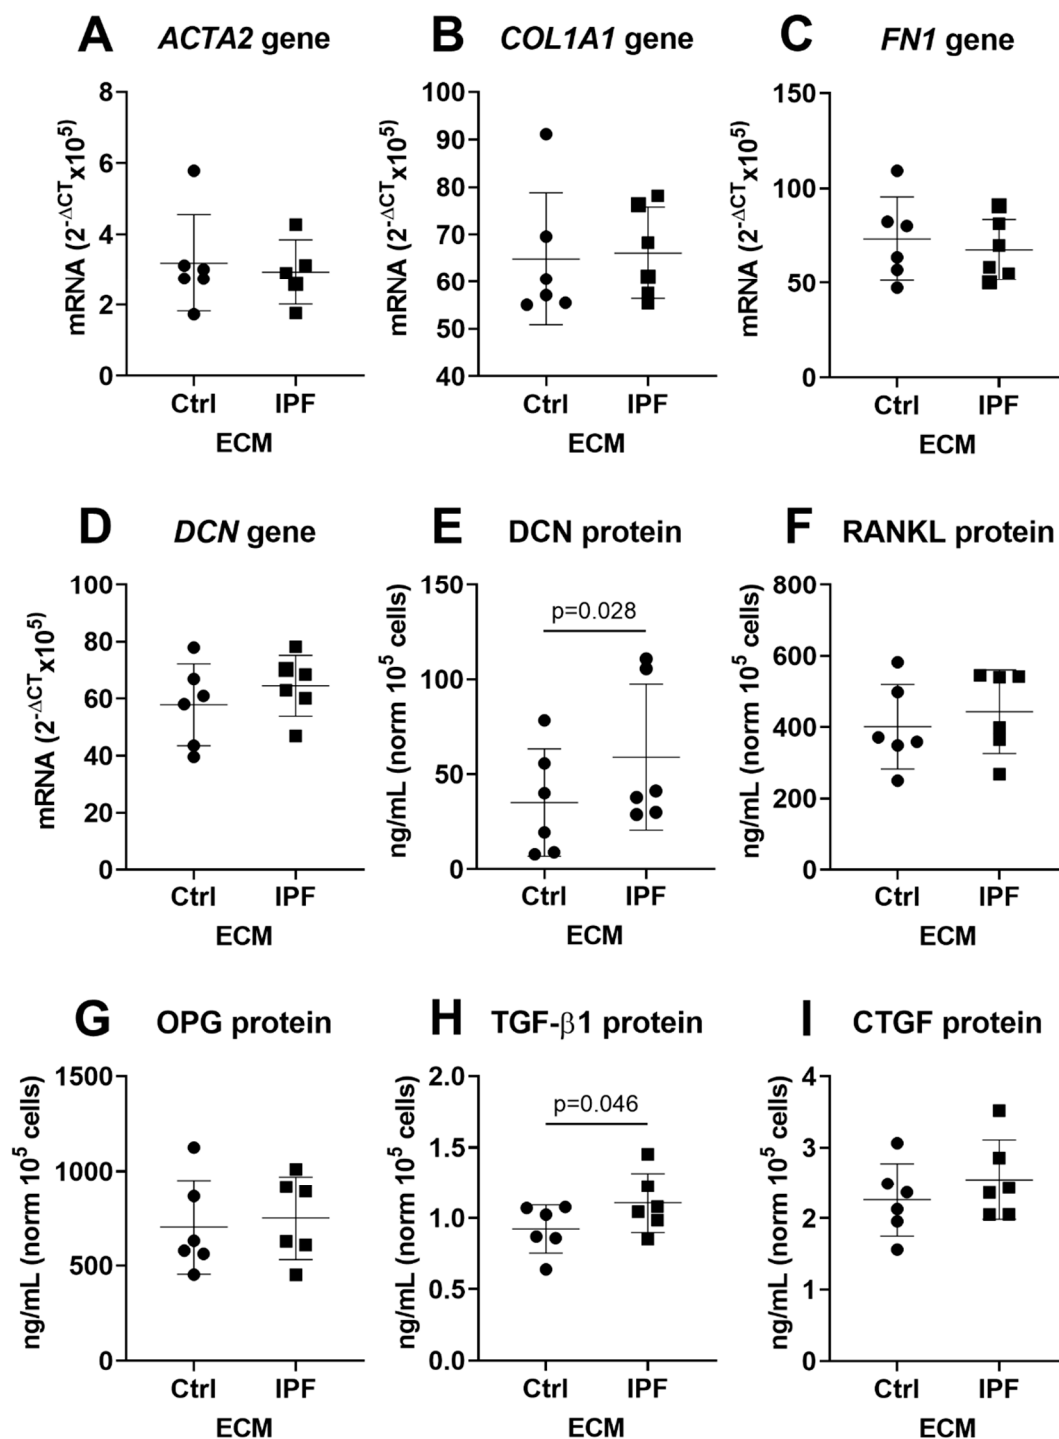

**Figure S4.** Fibrosis-associated gene expression and secretion of pro-fibrotic cytokines. Ctrl-LFs were cultured for up to three days on Ctrl or IPF derived ECM before expression levels of ACTA2, COL1 $\alpha$ 1, FN1 and DCN were assessed (A–D). Panel (F–I) shows protein secretion of known fibrotic factors DCN, RANKL, OPG, TGF- $\beta$ 1 and CTGF. Gene expression data were normalised against 18S and were expressed as  $2^{-\Delta CT} \times 10^5$  ( $n = 5-6$ ). Levels of cytokine production in supernatant were normalised to total cell number expressed as ng/mL per  $10^5$  cells ( $n = 5-6$ ). Wilcoxon matched-pairs signed rank test was used to measure difference between Ctrl and IPF and was considered significant at  $p < 0.05$ .



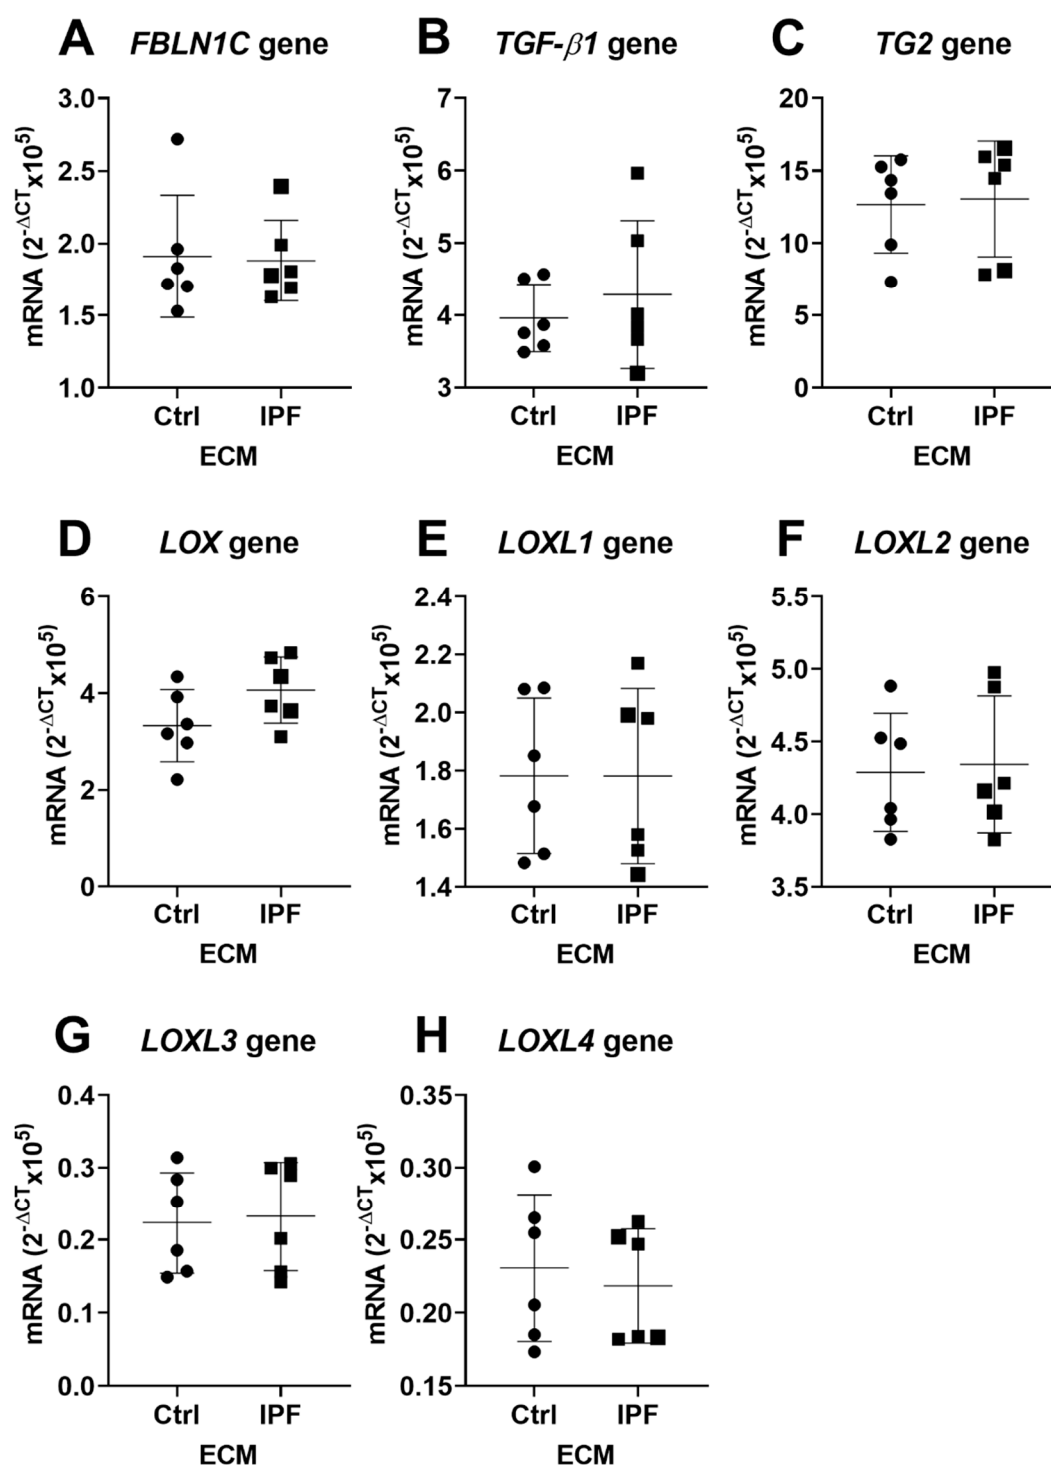

**Figure S5.** Fibrosis-associated and crosslink gene expression. Ctrl-LFs were cultured for up to three days on Ctrl or IPF derived ECM before expression levels of *Fbln1c*, *TGF-β1*, *TG2*, *LOX* and *LOXL1–4* were assessed (A–H). Gene expression data were normalised against 18S and were expressed as  $2^{-\Delta CT} \times 10^5$  ( $n = 5–6$ ). Levels of cytokine production in supernatant were normalised to total cell number expressed as ng/mL per  $10^5$  cells ( $n = 5–6$ ). Wilcoxon matched-pairs signed rank test was used to measure difference between Ctrl and IPF and was considered significant at  $p < 0.05$ .

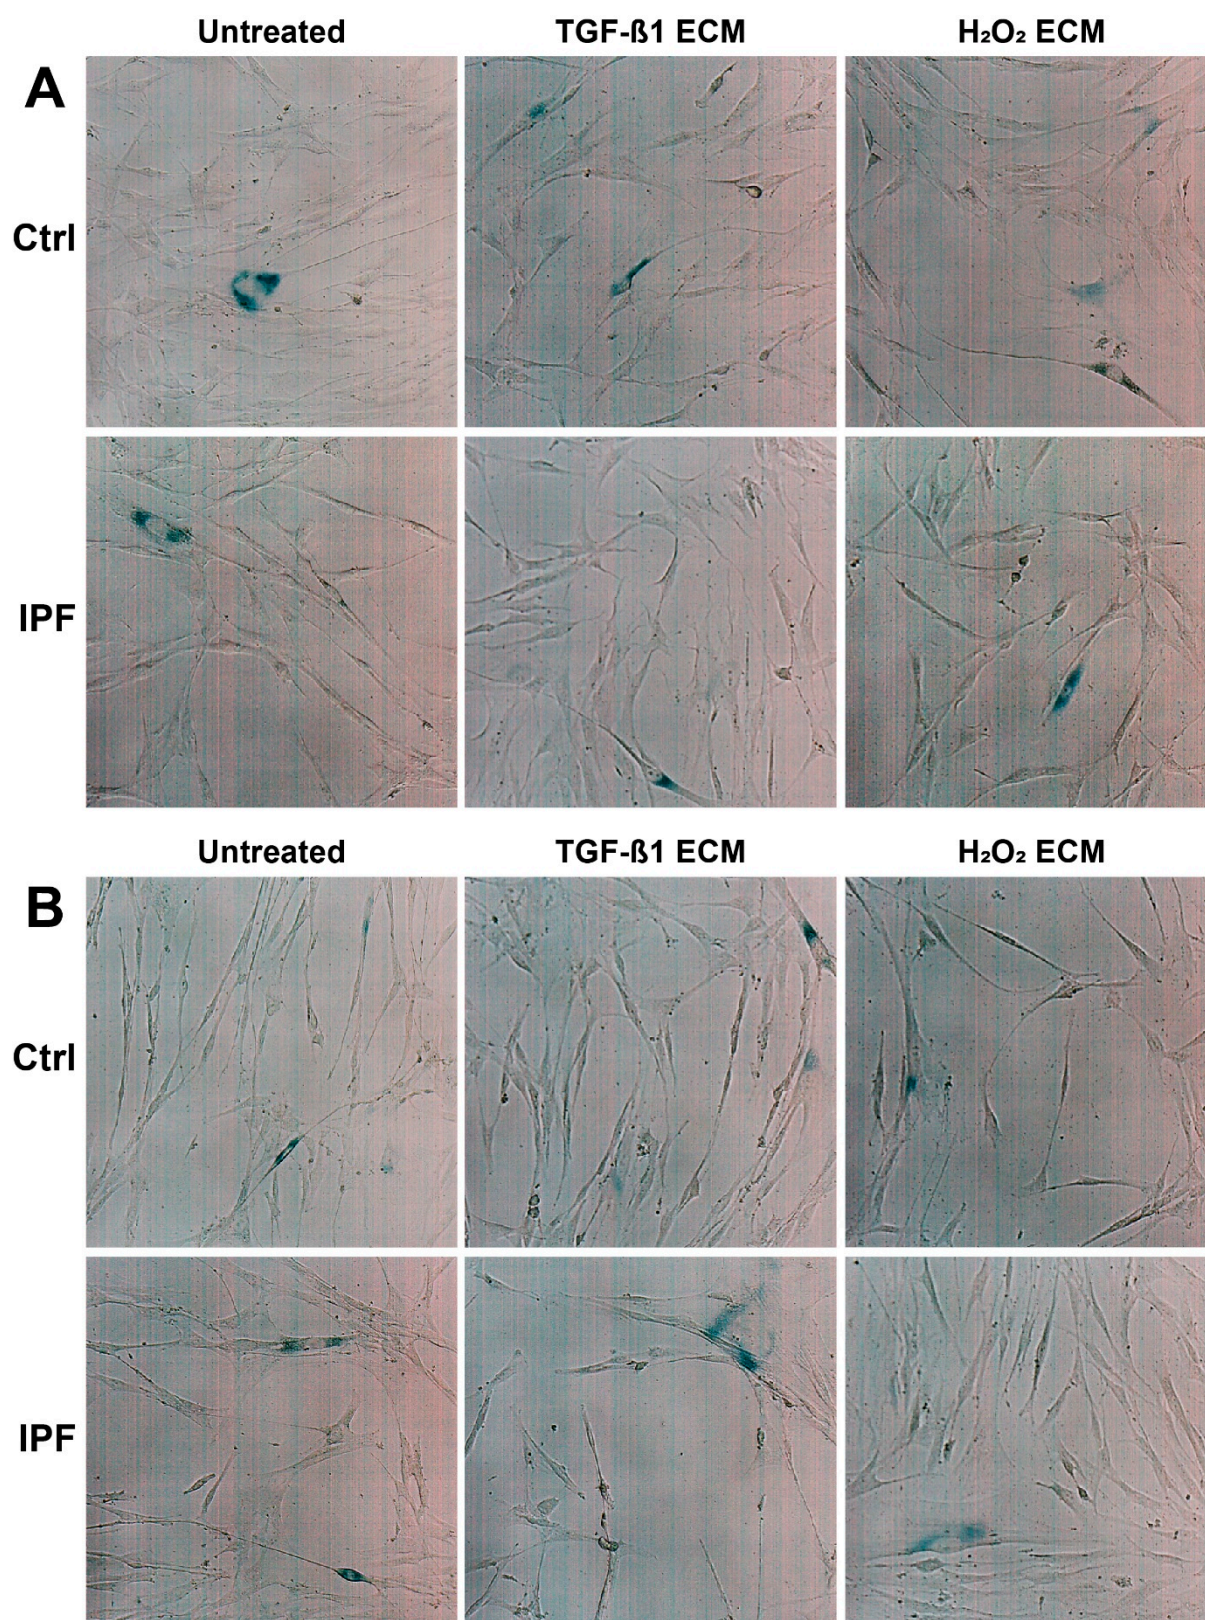

**Figure S6.** SA- $\beta$ -Gal positive cells cultured on Ctrl- and IPF derived ECM that received treatment. Ctrl-LFs were cultured for up to three days on Ctrl or IPF derived ECM and SA- $\beta$ -Gal positive (blue) cells were visualised using a Tissue-FAXS. Illustrated photographs are representative images of in total 6 unique donors. Control and IPF untreated are the same images as in Figure S1.

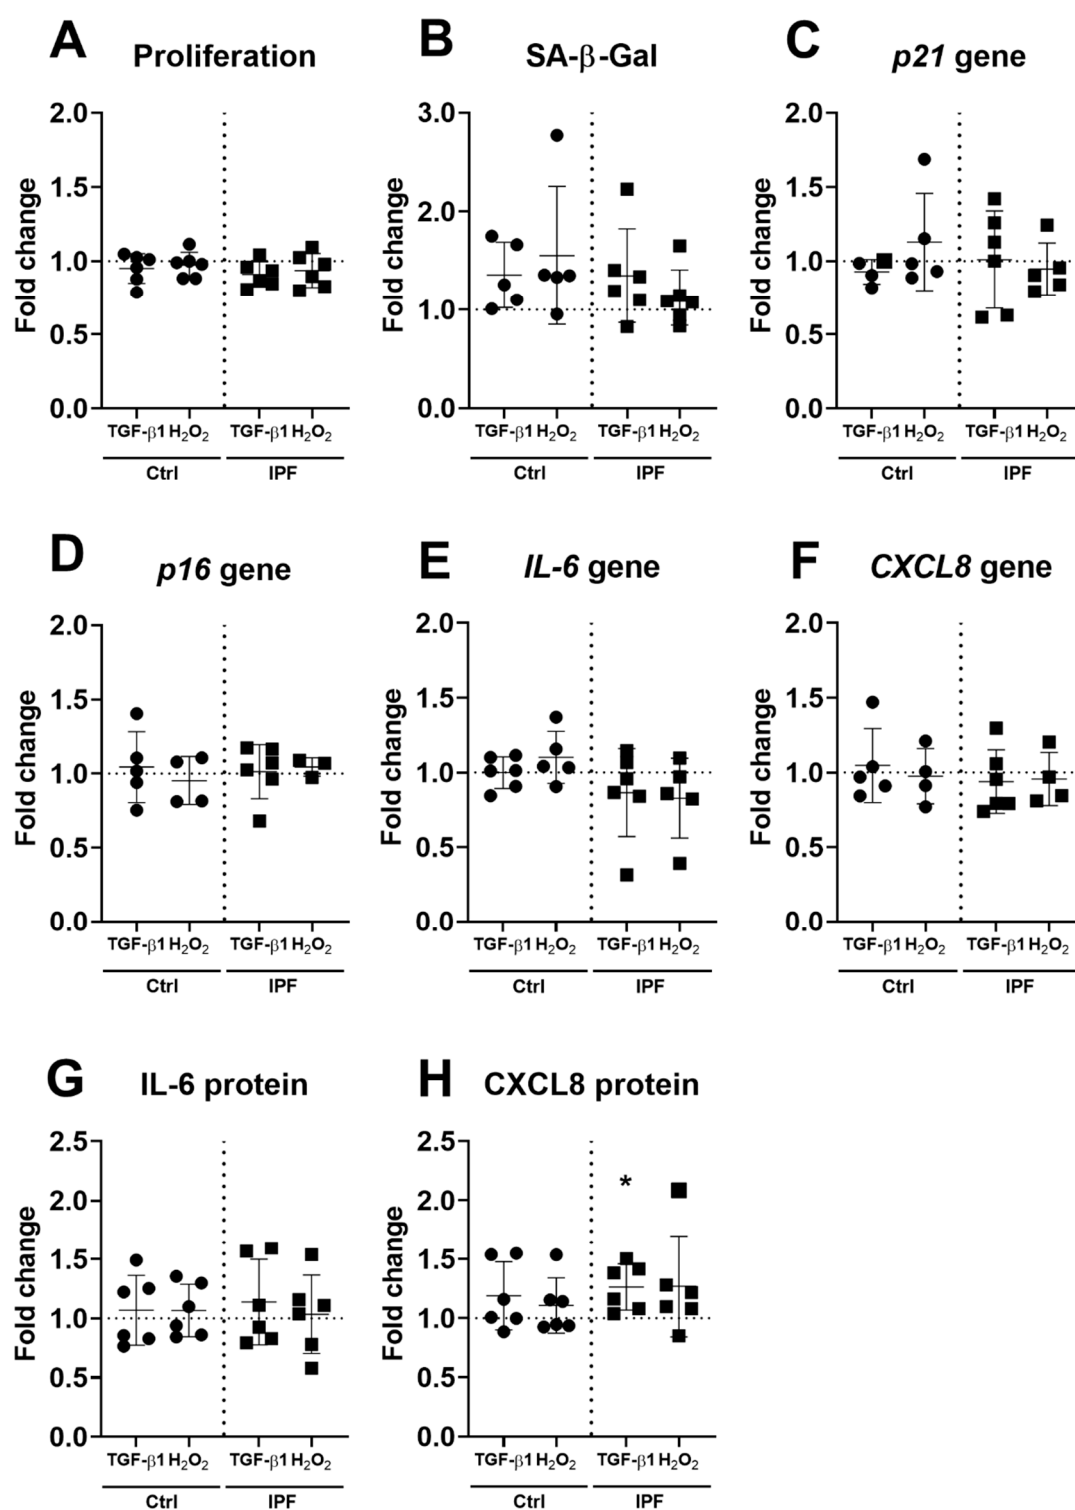

**Figure S7.** Markers of senescence in Ctrl-LFs cultured on treatment-derived ECM. Ctrl-LFs were cultured for up to three days on Ctrl or IPF derived ECM that received treatment with TGF- $\beta$ 1 or H<sub>2</sub>O<sub>2</sub> and proliferation was assessed by cell enumeration (A), and SA- $\beta$ -Gal positive cells were counted (B). Panel (C) and (D) demonstrates cell-cycle inhibitors p21<sup>Waf1/Cip1</sup> and p16<sup>Ink4a</sup> after three days of culture. Panel (E–H) gene expression and protein secretion of known SASP factors IL-6 and CXCL8. Both gene expression and levels of cytokine production were normalised as described before and expressed as fold change to their respecting Ctrl- or IPF-derived ECM without treatment ( $n = 5–6$ ). Data were analysed using repeated measures one-way ANOVA or if data points were missing a mixed-effects analysis (REML) and considered significant at \*  $p < 0.05$ .



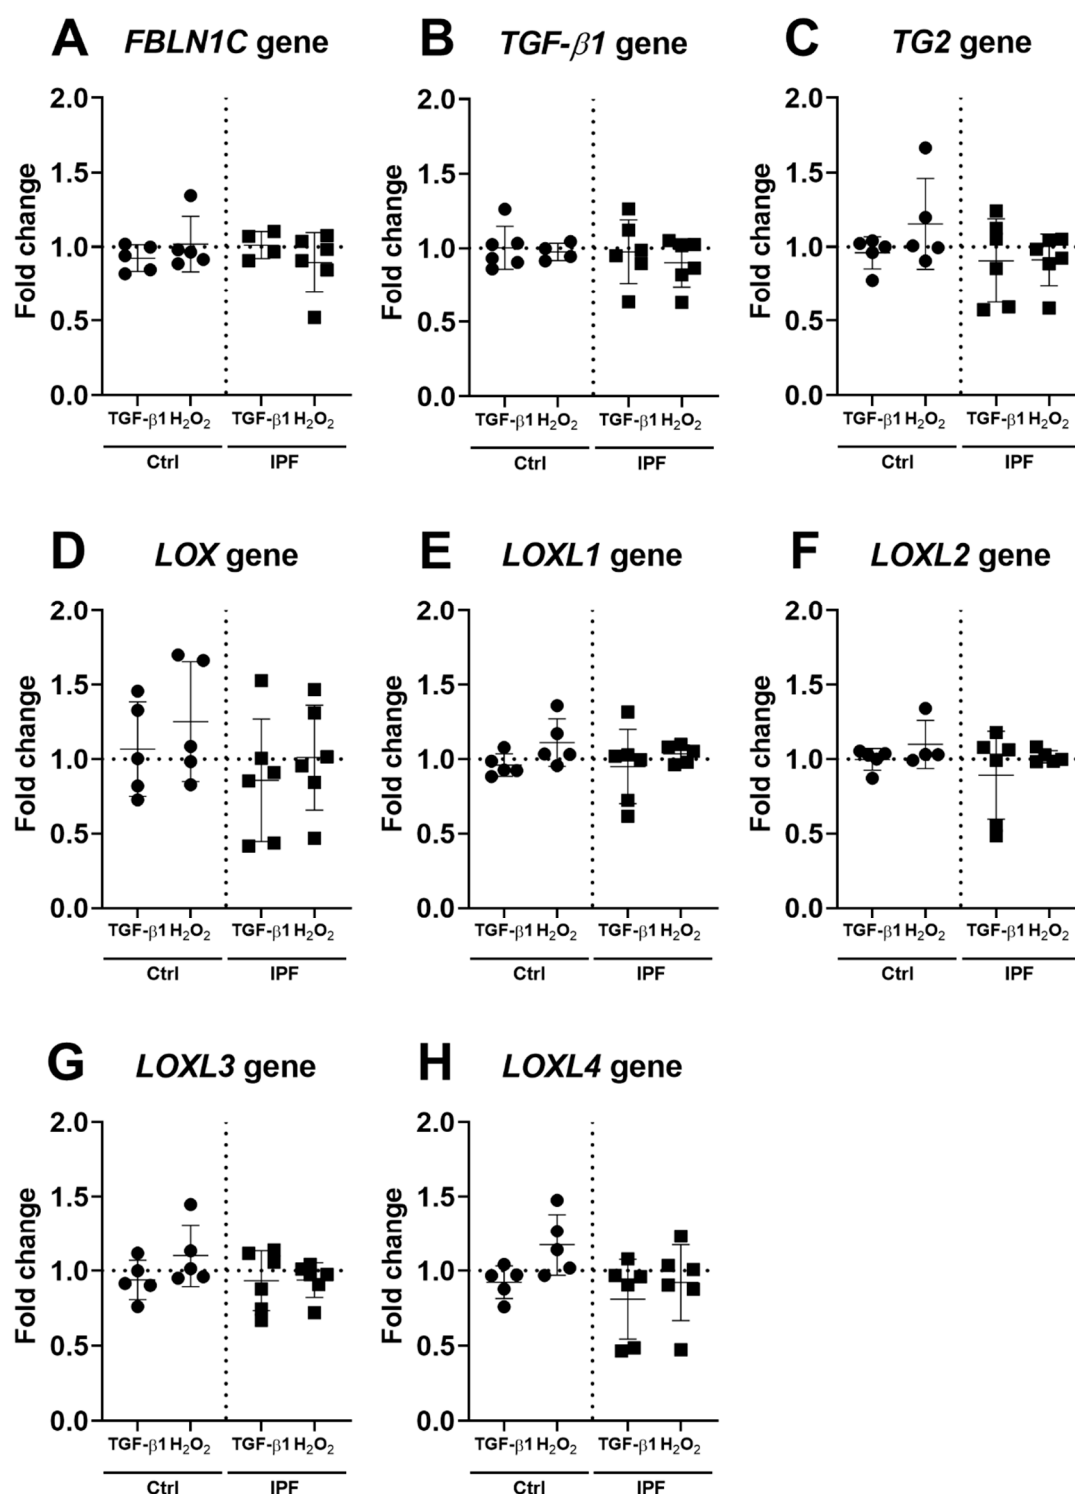

**Figure S8.** Fibrosis-associated and crosslink gene expression. Ctrl-LFs were cultured for up to three days on Ctrl or IPF derived ECM before expression levels of *Fbln1c*, *TGF-β1*, *TG2*, *LOX* and *LOXL1–4* were assessed (A–H). Data were normalised as described before and expressed as fold change to their respecting Ctrl- or IPF-derived ECM without treatment ( $n = 5–6$ ). Data were analysed using repeated measures one-way ANOVA or if data points were missing a mixed-effects analysis (REML) and considered significant at  $* p < 0.05$ .

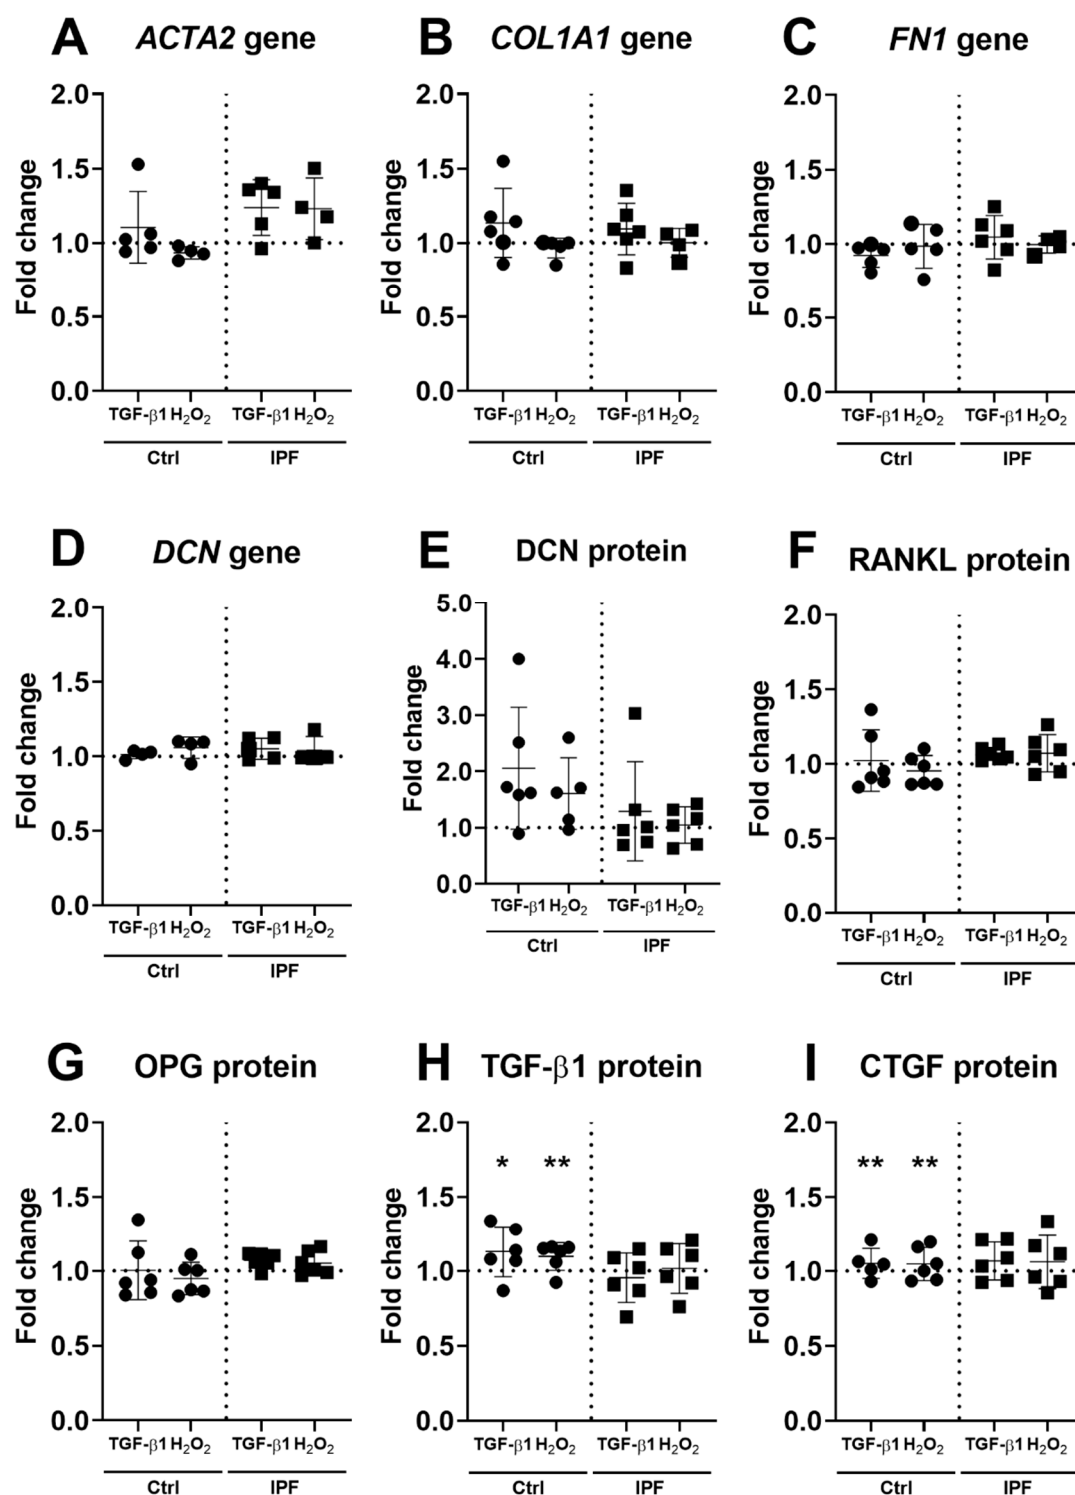

**Figure S9.** Fibrosis-associated gene expression and secretion of pro-fibrotic cytokines. Ctrl-LFs were cultured for up to three days on treatment-derived Ctrl- or IPF-ECM before expression levels of *ACTA2*, *COL1A1*, *FN1* and *DCN* were assessed (A–D). Panel F–I shows protein secretion of known fibrotic factors *DCN*, *RANKL*, *OPG*, *TGF-β1* and *CTGF*. Both gene expression and levels of cytokine production were normalised as described before and expressed as fold change to their respective Ctrl- or IPF ECM without treatment ( $n = 4–6$ ). Data were analysed using repeated measures one-way ANOVA or if data points were missing a mixed-effects analysis (REML) and considered significant at \*  $p < 0.05$ .

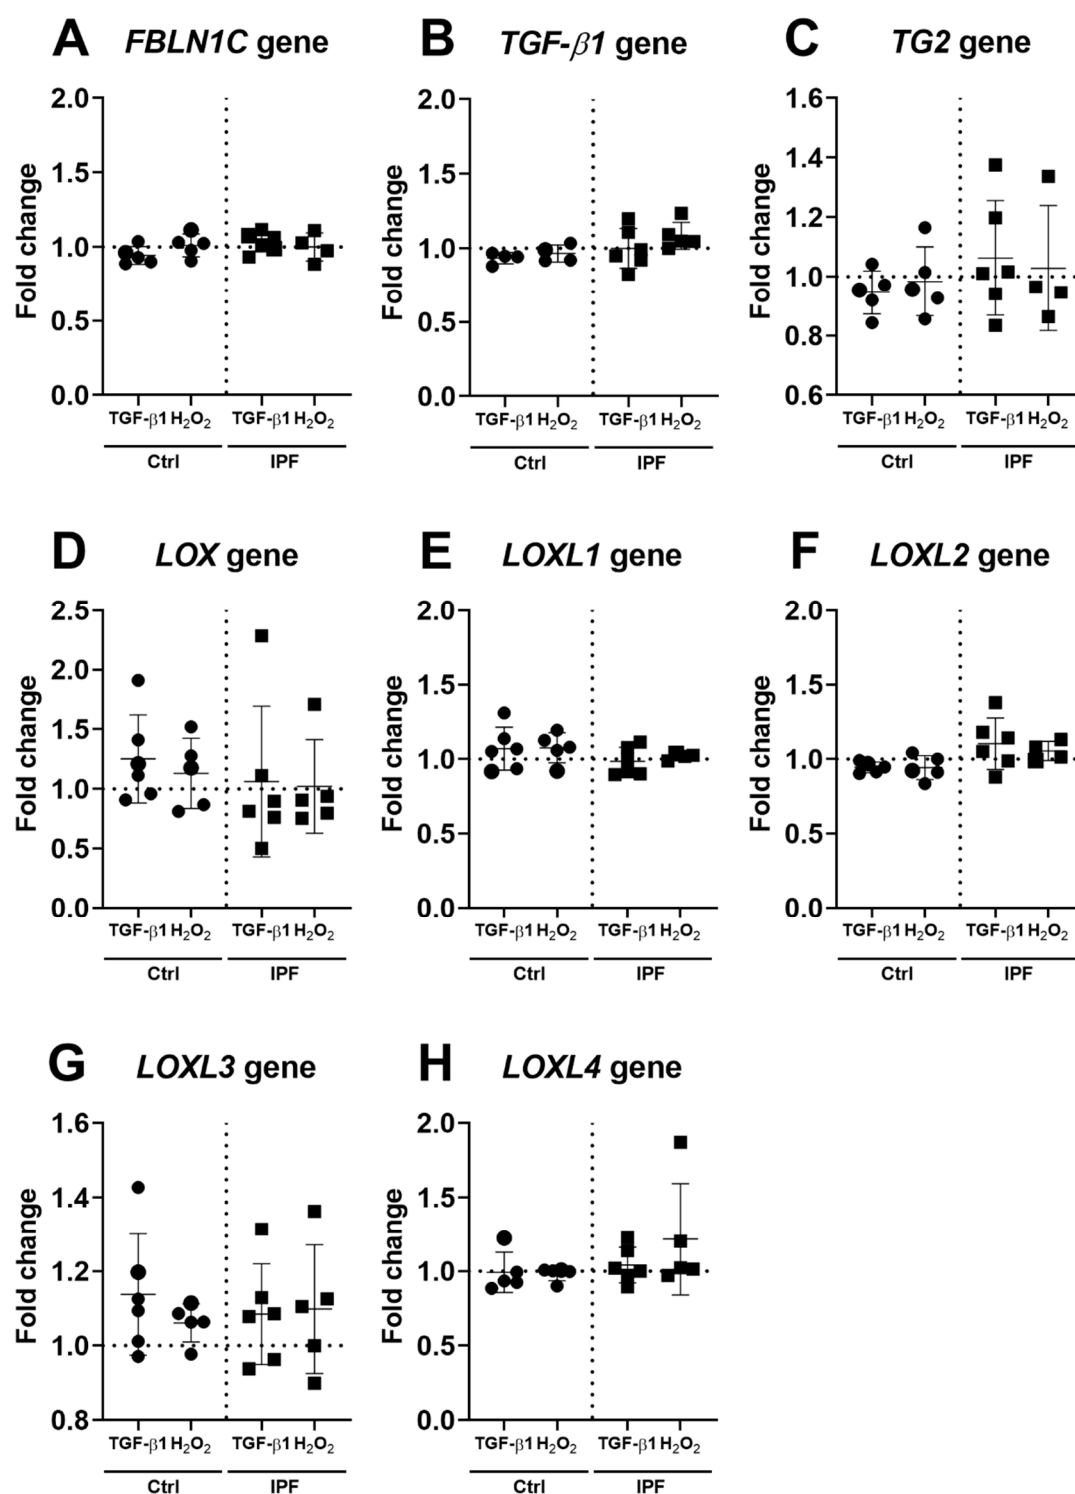

**Figure S10.** Fibrosis-associated and crosslink gene expression. Ctrl-LFs were cultured for up to three days on Ctrl or IPF derived ECM before expression levels of Fbln1c, TGF-β1, TG2, LOX and LOXL1–4 were assessed (A–H). Data were normalised as described before and expressed as fold change to their respective Ctrl- or IPF-derived ECM without treatment ( $n = 4–6$ ). Data were analysed using repeated measures one-way ANOVA or if data points were missing a mixed-effects analysis (REML) and considered significant at  $* p < 0.05$ .
